# Supplementary material
Source: PubMed Central journal article supplement (PMC8028894)
Supplement: BPA-23-661-s001.pdf [file BPA-23-661-s001.pdf]

Table S1. Sample numbers, positivity rates, and differences in methodology and diagnostic criteria; data from 59 studies including 93 test series.

| A. Tissue based assays                    | Criteria (NMO/MS)  | Tissue (species) | NMO (N, %)     | LETM (N, %)   | ON (N, %)     | ON+NET M (N, %) | Other HRS (N, %) | NETM (N, %) | MS* (N, %)     | OSMS (N, %)   | OND (N, %)   | ONND (N, %) | HC (N, %)  |
|-------------------------------------------|--------------------|------------------|----------------|---------------|---------------|-----------------|------------------|-------------|----------------|---------------|--------------|-------------|------------|
| <b>Fluoroimmunohistochemistry (IHC-F)</b> |                    |                  |                |               |               |                 |                  |             |                |               |              |             |            |
| <b>1. Original assay</b>                  |                    |                  |                |               |               |                 |                  |             |                |               |              |             |            |
| Lennon 2004 (91)                          | 1999/1983          | Mouse            | 33/45 (73.3)   | 14/27 (51.9)  | 2/8 (25)      | -               | -                | -           | 2/41 (4.88)    | -             | 0/56 (0)     | -           | -          |
| Wingerchuk 2006 (158)                     | **                 | Mouse            | 67/88 (76.1)   | -             | -             | -               | -                | -           | 2/32 (6.25)    | -             | -            | -           | -          |
| Weinshenker 2006 (154)                    | N.a./n.a.          | Mouse            | -              | 11/29 (37.9)  | -             | -               | -                | -           | -              | -             | -            | -           | -          |
| Matiello 2008 (105)                       | N.a./n.a.          | Mouse            | -              | -             | 5/25 (20)     | -               | -                | -           | -              | -             | -            | -           | -          |
| Scott 2008 (137)                          | 1999/1983          | Mouse            | 3/4 (75)       | -             | -             | -               | -                | 1/22 (4.55) | 0/6 (0)        | 0/6 (0)       | -            | -           | -          |
| Adoni 2008 (1)                            | 1999/n.a.          | Mouse            | 18/28 (64.3)   | -             | -             | -               | -                | -           | -              | -             | -            | -           | -          |
| Smith 2009 (140)                          | N.a./2001          | Mouse            | -              | -             | -             | -               | -                | -           | 0/130 (0)      | -             | -            | -           | -          |
| McKeon 2009 (110)                         | 2006/n.d.          | Mouse            | 23/40 (57.5)   | 5/43 (11.6)   | 2/57 (3.5)    | -               | -                | 0/64 (0)    | 0/249 (0)      | -             | 2/382 (0.52) | -           | -          |
| Kalluri 2010 (72)                         | N.d./n.d.          | Mouse            | 7/11 (63.6)    | -             | -             | -               | -                | -           | 1/3 (33.33)    | 1/3 (33.33)   | -            | -           | -          |
| Petzold 2010 (124)                        | 2006/2005          | Mouse            | 5/9 (55.6)     | -             | 4/77 (5.2)    | -               | -                | -           | 0/28 (0)       | -             | -            | -           | -          |
| Waters 2012 (152)                         | 1999 or 2006/ n.d. | Mouse            | 17/35 (48.6)   | 5/15 (33.3)   | 5/8 (62.5)    | -               | 2/3 (66.7)       | 0/2 (0)     | 0/39 (0)       | -             | 0/7 (0)      | 0/15 (0)    | 0/22 (0)   |
| <i>Sum</i>                                |                    |                  | 173/260 (66.5) | 35/114 (30.7) | 18/175 (10.3) | 0/0 (n.a.)      | 2/3 (66.7)       | 1/88 (1.14) | 5/528 (0.95)   | 1/9 (11.11)   | 2/445 (0.45) | 0/15 (0)    | 0/22 (0)   |
| <b>Asian patients</b>                     |                    |                  |                |               |               |                 |                  |             |                |               |              |             |            |
| Lennon 2004 (91)                          | 1999/1983          | Mouse            | -              | 1/1 (100)     | -             | -               | -                | -           | 6/16 (37.5)    | 6/11 (54.55)  | 0/5 (0)      | -           | -          |
| Nakashima 2006 (116)                      | 1999/2001          | Mouse            | 12/19 (63.2)   | -             | -             | -               | -                | 0/3 (0)     | 2/13 (15.38)   | -             | -            | -           | -          |
| Matsuoka 2007 (106)                       | Kira 1996          | Mouse            | -              | 1/3 (33.3)    | -             | -               | 2/22 (9.1)       | 0/1 (0)     | 14/91 (15.38)  | 13/48 (27.08) | 0/26 (0)     | -           | 0/35 (0)   |
| Hayakawa 2008 (32)                        | 2006/2001 or 2005  | Mouse            | 13/21 (61.9)   | -             | -             | -               | -                | -           | 2/46 (4.35)    | -             | -            | -           | -          |
| Matsushita 2009 (107)                     | 1999/2005          | Mouse            | 9/24 (37.5)    | -             | -             | -               | -                | -           | 9/74 (12.16)   | -             | -            | -           | -          |
| Apiwattanakul 2012 (4)                    | 2006/2005          | Mouse            | 4/10 (40)      | 2/7 (28.6)    | 1/3 (33.3)    | 1/3 (33.3)      | 1/2 (50)         | 0/1 (0)     | 0/5 (0)        | -             | -            | -           | -          |
| <i>Sum</i>                                |                    |                  | 38/74 (51.4)   | 4/11 (36.4)   | 1/3 (33.3)    | 1/3 (33.3)      | 3/24 (12.5)      | 0/5 (0)     | 33/245 (13.47) | 19/59 (32.2)  | 0/31 (0)     | 0/0 (n.a.)  | 0/35 (0)   |
| <b>Children</b>                           |                    |                  |                |               |               |                 |                  |             |                |               |              |             |            |
| Banwell 2008 (6)                          | 1999/1983 or 2001  | Mouse            | 8/17 (47.1)    | 1/10 (10)     | 1/13 (7.7)    | -               | 0/3 (0)          | 0/3 (0)     | 0/41 (0)       | -             | -            | -           | -          |
| Lotze 2008 (97)                           | 2007/n.d.          | Mouse            | 7/9 (77.8)     | 1/1 (100)     | -             | -               | -                | -           | -              | -             | -            | -           | -          |
| <i>Sum</i>                                |                    |                  | 15/26 (57.7)   | 2/11 (18.2)   | 1/13 (7.7)    | 0/0 (n.a.)      | 0/3 (0)          | 0/3 (0)     | 0/41 (0)       | 0/0 (n.a.)    | 0/0 (n.a.)   | 0/0 (n.a.)  | 0/0 (n.a.) |
| <i>Total, original assay</i>              |                    |                  | 226/360 (62.8) | 41/136 (30.1) | 20/191 (10.5) | 1/3 (33.3)      | 5/30 (16.7)      | 1/96 (1.04) | 38/814 (4.67)  | 20/68 (29.41) | 2/476 (0.42) | 0/15 (0)    | 0/57 (0)   |
| <b>2. Independent assays</b>              |                    |                  |                |               |               |                 |                  |             |                |               |              |             |            |
| Jarius 2007 (46)                          | 1999/2005          | Mouse            | 22/36 (61.1)   | 4/5 (80)      | -             | -               | -                | 0/11 (0)    | 1/80 (1.25)    | -             | 0/21 (0)     | -           | 0/25 (0)   |
| Waters 2008 (151)                         | 2006/2001          | Mouse            | 14/24 (58.3)   | 5/10 (50)     | -             | -               | -                | -           | 0/38 (0)       | -             | 1/26 (3.85)  | -           | 0/14 (0)   |
| Marignier 2008 (102)                      | 1999/2001          | Rat              | 14/26 (53.8)   | 7/13 (53.8)   | 4/21 (19)     | -               | -                | 0/8 (0)     | 5/52 (9.62)    | -             | 0/43 (0)     | -           | -          |

|                     |           |        |                |               |             |             |            |           |               |            |               |           |              |
|---------------------|-----------|--------|----------------|---------------|-------------|-------------|------------|-----------|---------------|------------|---------------|-----------|--------------|
| Bizzoco 2009 (10)   | 2006/1983 | Rat    | 4/7 (57.1)     | 3/10 (30)     | 0/66 (0)    | 2/28 (7.1)  | -          | 0/137 (0) | 1/556 (0.18)  | -          | 0/874 (0)     | 0/105 (0) | -            |
| Fazio 2009 (26)     | 2006/2001 | Mouse  | 13/33 (39.4)   | -             | -           | -           | -          | 0/6 (0)   | 0/20 (0)      | -          | -             | -         | 3/67 (4.48)  |
| Fazio 2009 (26)     | 2006/2001 | Monkey | 14/30 (46.7)   | -             | -           | -           | -          | 0/6 (0)   | 1/20 (5)      | -          | -             | -         | 3/67 (4.48)  |
| Jarius 2010 (59)    | 2006/2001 | Mouse  | 21/32 (65.6)   | 8/12 (66.7)   | 0/5 (0)     | 1/2 (50)    | -          | -         | 1/66 (1.52)   | -          | 0/23 (0)      | -         | 0/11 (0)     |
| De Vidi 2010 (19)   | 2006/2001 | Monkey | 18/48 (37.5)   | 3/4 (75)      | 0/3 (0)     | -           | -          | -         | 0/28 (0)      | -          | -             | -         | 0/8 (0)      |
| Jarius 2012 (47)    | 2006/2001 | Mouse  | 38/58 (65.5)   | 7/14 (50)     | 2/14 (14.3) | 1/3 (33.3)  | -          | -         | 2/87 (2.3)    | -          | 0/26 (0)      | -         | 0/5 (0)      |
| Granieri 2012 (31)  | 2006/2005 | Monkey | 19/20 (95)     | -             | -           | -           | -          | -         | 1/41 (2.44)   | -          | -             | -         | 2/30 (6.67)  |
| Delavance 2012 (21) | 2006/n.d. | Rat    | 40/47 (85.1)   | 10/17 (58.8)  | 3/5 (60)    | -           | -          | -         | 1/13 (7.69)   | -          | 0/46 (0)      | 0/545 (0) | -            |
| Alvarenga 2012 (2)  | N.a./n.a. | Rat    | -              | 7/17 (41.2)   | -           | -           | -          | 0/9 (0)   | -             | -          | -             | -         | -            |
| <i>Sum</i>          |           |        | 217/361 (60.1) | 54/102 (52.9) | 9/114 (7.9) | 4/33 (12.1) | 0/0 (n.a.) | 0/177 (0) | 13/1001 (1.3) | 0/0 (n.a.) | 1/1059 (0.09) | 0/650 (0) | 8/227 (3.52) |

#### Asian patients

|                                  |           |        |                |               |               |             |             |              |                |               |               |            |              |
|----------------------------------|-----------|--------|----------------|---------------|---------------|-------------|-------------|--------------|----------------|---------------|---------------|------------|--------------|
| Chan 2010 (12)                   | 2006/2005 | Monkey | 11/18 (61.1)   | 6/14 (42.9)   | 3/23 (13)     | -           | -           | 0/26 (0)     | 0/40 (0)       | -             | 0/42 (0)      | -          | 0/10 (0)     |
| Kim 2012 (83)                    | 2006/2005 | Mouse  | 4/9 (44.4)     |               | 2/32 (6.3)    | -           | -           | -            | 3/10 (30)      | 2/2 (100)     | 1/60 (1.67)   | -          | -            |
| Long 2012 (92)                   | 2006/2005 | Mouse  | 35/50 (70)     | 10/18 (55.6)  | 3/10 (30)     | -           | -           | 0/3 (0)      | 7/57 (12.28)   | -             | 0/10 (0)      | -          | 0/20 (0)     |
| Long 2012 (92)                   | 2006/2005 | Monkey | 31/50 (62)     | 7/18 (38.9)   | 5/10 (50)     | -           | -           | 0/3 (0)      | 6/57 (10.53)   | -             | 0/10 (0)      | -          | 0/20 (0)     |
| <i>Sum</i>                       |           |        | 81/127 (63.8)  | 23/50 (46)    | 13/75 (17.3)  | 0/0 (n.a.)  | 0/0 (n.a.)  | 0/32 (0)     | 16/164 (9.76)  | 2/2 (100)     | 1/122 (0.82)  | 0/0 (n.a.) | 0/50 (0)     |
| <i>Total, independent assays</i> |           |        | 298/488 (61.1) | 77/152 (50.7) | 22/189 (11.6) | 4/33 (12.1) | 0/0 (n.a.)  | 0/209 (0)    | 29/1165 (2.49) | 2/2 (100)     | 2/1181 (0.17) | 0/650 (0)  | 8/277 (2.89) |
| <i>Total, all IHC-F</i>          |           |        | 524/848 (61.8) | 118/288 (41)  | 42/380 (11.1) | 5/36 (13.9) | 5/30 (16.7) | 1/305 (0.33) | 67/1979 (3.39) | 22/70 (31.43) | 4/1657 (0.24) | 0/665 (0)  | 8/334 (2.4)  |

#### Conventional immunohistochemistry (IHC-C)

|                 |                   |     |              |          |            |   |   |         |           |   |   |   |   |
|-----------------|-------------------|-----|--------------|----------|------------|---|---|---------|-----------|---|---|---|---|
| Saiz 2007 (135) | 1999 or 2006/1983 | Rat | 10/16 (62.5) | 2/4 (50) | 1/7 (14.3) | - | - | 0/3 (0) | 0/127 (0) | - | - | - | - |
|-----------------|-------------------|-----|--------------|----------|------------|---|---|---------|-----------|---|---|---|---|

| B. Cell-based assays | Criteria (NMO/MS) | AQP4 (species, isoform, fluorophor) | NMO (N, %) | LETM (N, %) | ON (N, %) | ON+NET M (N, %) | Other HRS (N, %) | NETM (N, %) | MS* (N, %) | OSMS (N, %) | OND (N, %) | ONND (N, %) | HC (N, %) |
|----------------------|-------------------|-------------------------------------|------------|-------------|-----------|-----------------|------------------|-------------|------------|-------------|------------|-------------|-----------|
|----------------------|-------------------|-------------------------------------|------------|-------------|-----------|-----------------|------------------|-------------|------------|-------------|------------|-------------|-----------|

#### Fluoroimmunocytochemistry (ICC-F)

##### a. In-house

|                   |                    |                |               |              |             |            |           |         |              |            |          |             |           |
|-------------------|--------------------|----------------|---------------|--------------|-------------|------------|-----------|---------|--------------|------------|----------|-------------|-----------|
| Lennon 2005 (90)  | N.a./1999          | Hu,M1,GFP      | 3/3 (100)     | -            | -           | -          | -         | -       | -            | -          | 0/3 (0)  | -           | -         |
| Waters 2008 (151) | 2006/2001          | Hu,M1+M23 EGFP | 20/25 (80)    | 6/11 (54.5)  | -           | -          | -         | -       | 0/38 (0)     | -          | 0/26 (0) | -           | 0/14 (0)  |
| Mader 2011 (100)  | 1999/2005          | Hu,M23, EmGFP  | 29/30 (96.7)  | 16/24 (66.7) | 1/2 (50)    | -          | -         | -       | 1/128 (0.78) | -          | 0/29 (0) | 1/30 (3.33) | 0/47 (0)  |
| Mader 2011 (100)  | 1999/2005          | Hu,M1, EmGFP   | 21/30 (70)    | 9/24 (37.5)  | 1/2 (50)    | -          | -         | -       | 1/128 (0.78) | -          | 0/29 (0) | 0/30 (0)    | 0/47 (0)  |
| Waters 2012 (152) | 1999,2006/McDonald | Hu,M23         | 24/35 (68.6)  | 12/15 (80)   | 5/8 (62.5)  | -          | 3/3 (100) | 0/2 (0) | 0/39 (0)     | -          | 0/7 (0)  | 0/15 (0)    | 0/22 (0)  |
| <i>Sum</i>        |                    |                | 97/123 (78.9) | 43/74 (58.1) | 7/12 (58.3) | 0/0 (n.a.) | 3/3 (100) | 0/2 (0) | 2/333 (0.6)  | 0/0 (n.a.) | 0/94 (0) | 1/75 (1.33) | 0/130 (0) |



|                                |                                  |       |                   |                   |                  |                |                 |             |                   |                   |           |                |            |
|--------------------------------|----------------------------------|-------|-------------------|-------------------|------------------|----------------|-----------------|-------------|-------------------|-------------------|-----------|----------------|------------|
| Etemadifar 2012 (24)           | 2006/2005                        | Hu,M1 | 2/2 (100)         | -                 | 2/33 (6.1)       | -              | -               | -           | 0/6 (0)           | -                 | -         | -              | -          |
| Etemadifar 2012 (25)           | 2006/Kira<br>2003+not<br>NMO2006 | Hu,M1 | 16/32 (50)        | -                 | -                | 0/32 (0)       | -               | -           | -                 | -                 | -         | -              | -          |
| <i>Sum</i>                     |                                  |       | 226/297<br>(76.1) | 41/82 (50)        | 10/98 (10.2)     | 2/35 (5.7)     | 2/2 (100)       | 1/25 (4)    | 5/147 (3.4)       | 0/10 (0)          | 0/85 (0)  | 1/2 (50)       | 0/0 (n.a.) |
| <i>Total, commercial assay</i> |                                  |       | 307/400<br>(76.8) | 60/109 (55)       | 17/111<br>(15.3) | 4/37<br>(10.8) | 5/5 (100)       | 2/28 (7.14) | 5/329 (1.52)      | 0/10 (0)          | 0/190 (0) | 1/17<br>(5.88) | 0/93 (0)   |
| <i>Total, ICC-F</i>            |                                  |       | 601/811<br>(74.1) | 123/257<br>(47.9) | 40/201<br>(19.9) | 5/38<br>(13.2) | 36/89<br>(40.4) | 2/57 (3.51) | 68/1208<br>(5.63) | 50/148<br>(33.78) | 0/649 (0) | 2/92<br>(2.17) | 0/341 (0)  |

### Flow cytometry (FACS)

#### a. HEK293 cells

|                        |                      |                   |              |            |          |                |           |         |              |   |          |          |             |
|------------------------|----------------------|-------------------|--------------|------------|----------|----------------|-----------|---------|--------------|---|----------|----------|-------------|
| Fazio 2009 (26)        | 2006/2001            | Hu,M1,<br>EGFP    | 10/33 (30.3) | -          | -        | -              | -         | 0/6 (0) | 1/20 (5)     | - | -        | -        | 2/67 (2.99) |
| De Vidi 2010 (19)      | 2006/2001            | Hu,M1,<br>EGFP    | 18/48 (37.5) | 3/4 (75)   | 0/3 (0)  | -              | -         | -       | 0/28 (0)     | - | -        | -        | 0/8 (0)     |
| Ketelslegers 2011 (78) | 2006/2005            | Hu,M1+M23<br>EGFP | 20/36 (55.6) | -          | -        | 4/40<br>(17.4) | -         | -       | 2/158 (1.27) | - | 0/61 (0) | -        | -           |
| Waters 2012 (152)      | 1999 or<br>2006/n.d. | Hu,M23,<br>DSRED  | 25/35 (71.4) | 12/15 (80) | 6/8 (75) | -              | 3/3 (100) | 0/2 (0) | 0/39 (0)     | - | 0/7 (0)  | 0/15 (0) | 0/22 (0)    |

#### Asian patients

|                    |           |       |               |              |             |                |           |         |              |            |           |          |             |
|--------------------|-----------|-------|---------------|--------------|-------------|----------------|-----------|---------|--------------|------------|-----------|----------|-------------|
| Isobe 2012 (38)    | 1999/2005 | Hu,M1 | 15/29 (51.7)  | -            | -           | -              | -         | -       | -            | -          | 0/86 (0)  | -        | 0/28 (0)    |
| <i>Sum, HEK293</i> |           |       | 88/181 (48.6) | 15/19 (78.9) | 6/11 (54.5) | 4/23<br>(17.4) | 3/3 (100) | 0/8 (0) | 3/245 (1.22) | 0/0 (n.a.) | 0/154 (0) | 0/15 (0) | 2/125 (1.6) |

#### b. LN18 cells

|                    |           |       |                   |              |              |                |           |         |             |             |           |          |             |
|--------------------|-----------|-------|-------------------|--------------|--------------|----------------|-----------|---------|-------------|-------------|-----------|----------|-------------|
| Kalluri 2010 (72)  | 2006/2005 | Hu,M1 | 9/11 (81.8)       | -            | -            | -              | -         | -       | 1/3 (33.33) | 1/3 (33.33) | -         | -        | -           |
| Kalluri 2010 (72)  | 2006/2005 | Hu,M1 | 11/18 (61.1)      | 10/27 (37)   | 5/12 (41.7)  | -              | -         | -       | 0/38 (0)    | -           | -         | -        | -           |
| <i>Total, FACS</i> |           |       | 108/210<br>(51.4) | 25/46 (54.3) | 11/23 (47.8) | 4/23<br>(17.4) | 3/3 (100) | 0/8 (0) | 4/286 (1.4) | 1/3 (33.33) | 0/154 (0) | 0/15 (0) | 2/125 (1.6) |

| <b>C. Protein based assays</b>                | <b>Criteria (NMO/MS)</b> | <b>AQP4 (species, isoform, fluorophor)</b> | <b>NMO (N, %)</b> | <b>LETM (N, %)</b> | <b>ON (N, %)</b> | <b>ON+NET M (N, %)</b> | <b>Other HRS (N, %)</b> | <b>NETM (N, %)</b> | <b>MS* (N, %)</b> | <b>OSMS (N, %)</b> | <b>OND (N, %)</b> | <b>ONND (N, %)</b> | <b>HC (N, %)</b> |
|-----------------------------------------------|--------------------------|--------------------------------------------|-------------------|--------------------|------------------|------------------------|-------------------------|--------------------|-------------------|--------------------|-------------------|--------------------|------------------|
| <b>Radioimmunoprecipitation assays (RIPA)</b> |                          |                                            |                   |                    |                  |                        |                         |                    |                   |                    |                   |                    |                  |
| Paul, Jarius, Aktas 2007 (123)                | 1999 or<br>2006/2001     | Hu,M1,35S-<br>methionine-<br>labelled      | 21/37 (56.8)      | 6/6 (100)          | 0/11 (0)         | -                      | -                       | 0/15 (0)           | 4/144 (2.78)      | -                  | 1/47 (2.13)       | 0/45 (0)           | 0/29 (0)         |
| Fazio 2009 (26)                               | 2006/2001                | Hu,M1,35S-<br>methionine-<br>labelled      | 11/33 (33.3)      | -                  | -                | -                      | -                       | 1/6 (16.67)        | 0/20 (0)          | -                  | -                 | -                  | 2/67 (2.99)      |
| <i>Total, RIPA</i>                            |                          |                                            | 32/70 (45.7)      | 6/6 (100)          | 0/11 (0)         | 0/0 (n.a.)             | 0/0 (n.a.)              | 1/21 (4.76)        | 4/164 (2.44)      | 0/0 (n.a.)         | 1/47 (2.13)       | 0/45 (0)           | 2/96 (2.08)      |

## Fluoroimmunoprecipitation assays (FIPA)

### a. M1/M23-EGFP, protein A

|                   |                       |                   |                     |                   |                     |                   |                  |                |                 |                   |                 |                 |                 |
|-------------------|-----------------------|-------------------|---------------------|-------------------|---------------------|-------------------|------------------|----------------|-----------------|-------------------|-----------------|-----------------|-----------------|
| Waters 2008 (151) | 2006/2001             | Hu,M1+M23<br>EGFP | 19/25 (76)          | 6/11 (54.5)       | -                   | -                 | -                | -              | 0/38 (0)        | -                 | 0/26 (0)        | -               | 0/14 (0)        |
| Waters 2012 (152) | 1999 or<br>2006/ n.d. | Hu,M23,<br>EGFP   | 16/35 (45.7)        | 8/14 (57.1)       | 5/8 (62.5)          | -                 | 3/3 (100)        | 0/2 (0)        | 0/39 (0)        | -                 | 0/7 (0)         | 0/15 (0)        | 0/22 (0)        |
| Jarius 2011 (49)  | 2006/2001             | Hu,M1+M23<br>EGFP | 10/17 (58.8)        | -                 | 8/139 (5.8)         | -                 | -                | -              | -               | -                 | -               | -               | -               |
| <i>Sum</i>        |                       |                   | <i>45/77 (58.4)</i> | <i>14/25 (56)</i> | <i>13/147 (8.8)</i> | <i>0/0 (n.a.)</i> | <i>3/3 (100)</i> | <i>0/2 (0)</i> | <i>0/77 (0)</i> | <i>0/0 (n.a.)</i> | <i>0/33 (0)</i> | <i>0/15 (0)</i> | <i>0/36 (0)</i> |

### b. M1-EGFP, protein G

|                    |                       |                |                      |                     |                     |                   |                  |                 |                     |                    |                         |                 |                    |
|--------------------|-----------------------|----------------|----------------------|---------------------|---------------------|-------------------|------------------|-----------------|---------------------|--------------------|-------------------------|-----------------|--------------------|
| McKeon 2009 (110)  | 2006/n.d.             | Hu,M1,<br>EGFP | 13/40 (32.5)         | 1/43 (2.3)          | 2/57 (3.5)          | -                 | -                | 0/64 (0)        | 1/249 (0.4)         | -                  | 4/382<br>(1.05)         | -               | -                  |
| Kalluri 2010 (72)  | N.d./n.d.             | Hu,M1,<br>EGFP | 8/11 (72.7)          | -                   | -                   | -                 | -                | -               | 1/3 (33.33)         | 1/3 (33.33)        | -                       | -               | -                  |
| Waters 2012 (152)  | 1999 or<br>2006/ n.d. | Hu,M1,<br>EGFP | 16/35 (45.7)         | 8/15 (53.3)         | 5/8 (62.5)          | -                 | 3/3 (100)        | 0/2 (0)         | 1/39 (2.56)         | -                  | 0/7 (0)                 | 0/15 (0)        | 1/22 (4.55)        |
| <i>Sum</i>         |                       |                | <i>37/86 (43)</i>    | <i>9/58 (15.5)</i>  | <i>7/65 (10.8)</i>  | <i>0/0 (n.a.)</i> | <i>3/3 (100)</i> | <i>0/66 (0)</i> | <i>3/291 (1.03)</i> | <i>1/3 (33.33)</i> | <i>4/389<br/>(1.03)</i> | <i>0/15 (0)</i> | <i>1/22 (4.55)</i> |
| <i>Total, FIPA</i> |                       |                | <i>82/163 (50.3)</i> | <i>23/83 (27.7)</i> | <i>20/212 (9.4)</i> | <i>0/0 (n.a.)</i> | <i>6/6 (100)</i> | <i>0/68 (0)</i> | <i>3/368 (0.82)</i> | <i>1/3 (33.33)</i> | <i>4/422<br/>(0.95)</i> | <i>0/30 (0)</i> | <i>1/58 (1.72)</i> |

## Western blot assays (WB)

|                     |           |                      |              |   |   |   |   |   |             |   |   |   |                 |
|---------------------|-----------|----------------------|--------------|---|---|---|---|---|-------------|---|---|---|-----------------|
| Marnetto 2009 (104) | 2006/2005 | Mo,M1,<br>denatured  | 13/16 (81.3) | - | - | - | - | - | 2/36 (5.56) | - | - | - | 0/30 (0)        |
| Marnetto 2009 (104) | 2006/2005 | Mo,M21,<br>denatured | 2/16 (12.5)  | - | - | - | - | - | 1/36 (2.78) | - | - | - | 5/30<br>(16.67) |

## Enzyme linked immunosorbent assays (ELISA)

### a. In-house assays

#### Asian patients

|                    |                      |                        |              |   |   |   |   |   |              |   |                 |   |          |
|--------------------|----------------------|------------------------|--------------|---|---|---|---|---|--------------|---|-----------------|---|----------|
| Hayakawa 2008 (32) | 2006/2001<br>or 2005 | Rat,M23,<br>HIS-tagged | 15/21 (71.4) | - | - | - | - | - | 2/46 (4.35)  | - | 3/115<br>(2.61) | - | 0/51 (0) |
| Kim 2012 (82)      | 2006/2005            | Hu,M23,<br>HIS-tagged  | 46/64 (71.9) | - | - | - | - | - | 4/105 (3.81) | - | 0/57 (0)        | - | 0/47 (0) |

### b. Commercial, RSR

|                   |                       |                  |              |              |             |            |           |         |              |   |             |          |          |
|-------------------|-----------------------|------------------|--------------|--------------|-------------|------------|-----------|---------|--------------|---|-------------|----------|----------|
| Jarius 2012 (47)  | 2006/2001             | Hu,M1,<br>biotin | 50/66 (75.8) | 17/25 (68)   | 3/14 (21.4) | 2/3 (66.7) | -         | -       | 1/109 (0.92) | - | 1/39 (2.56) | -        | 0/5 (0)  |
| Waters 2012 (152) | 1999 or<br>2006/ n.d. | Hu,M1,<br>biotin | 18/35 (51.4) | 10/15 (66.7) | 5/8 (62.5)  | -          | 3/3 (100) | 0/2 (0) | 0/39 (0)     | - | 0/7 (0)     | 0/15 (0) | 0/22 (0) |

#### Asian patients

|                         |           |                  |                           |                     |                     |                   |                 |                    |                          |                   |                         |                 |                  |
|-------------------------|-----------|------------------|---------------------------|---------------------|---------------------|-------------------|-----------------|--------------------|--------------------------|-------------------|-------------------------|-----------------|------------------|
| Isobe 2012 (38)         | 2006/n.d. | Hu,M1,<br>biotin | 14/29 (48.3)              | -                   | -                   | -                 | -               | -                  | -                        | -                 | 0/86 (0)                | -               | 0/28 (0)         |
| Isobe 2012 (38)         | 2006/n.d. | Hu,M1,<br>biotin | -                         | -                   | -                   | -                 | -               | -                  | -                        | -                 | 0/40 (0)                | -               | 0/138 (0)        |
| Apiwattanakul 2012 (4)  | 2006/2005 | Hu,n.d.          | 5/10 (50)                 | 6/7 (85.7)          | 2/3 (66.7)          | 1/3 (33.3)        | 1/2 (50)        | 1/1 (100)          | 0/5 (0)                  | -                 | -                       | -               | -                |
| Kim 2012 (83)           | 2006/2005 | Hu,n.d.          | 5/9 (55.6)                | -                   | 4/32 (12.5)         | -                 | -               | -                  | 3/10 (30)                | 2/2 (100)         | 0/60 (0)                | -               | -                |
| <i>Total, RSR ELISA</i> |           |                  | <i>37/74 (50)</i>         | <i>16/22 (72.7)</i> | <i>7/11 (63.6)</i>  | <i>1/3 (33.3)</i> | <i>4/5 (80)</i> | <i>1/3 (33.33)</i> | <i>0/44 (0)</i>          | <i>0/0 (n.a.)</i> | <i>0/133 (0)</i>        | <i>0/15 (0)</i> | <i>0/188 (0)</i> |
| <i>Total, ELISA</i>     |           |                  | <i>153/234<br/>(65.4)</i> | <i>33/47 (70.2)</i> | <i>14/57 (24.6)</i> | <i>3/6 (50)</i>   | <i>4/5 (80)</i> | <i>1/3 (33.33)</i> | <i>10/314<br/>(3.18)</i> | <i>2/2 (100)</i>  | <i>4/404<br/>(0.99)</i> | <i>0/15 (0)</i> | <i>0/291 (0)</i> |

NMO = neuromyelitis optica; LETM = longitudinally extensive transverse myelitis (>=3 vertebral segments); NETM = non-longitudinally extensive transverse myelitis; ON = optic neuritis; HRS = high-risk syndromes; MS = multiple sclerosis; OSMS = optico-spinal multiple sclerosis; OND = other neurological diseases; ONND = other non-neurological diseases; HC = healthy controls; Hu = human; GFP = green fluorescent protein; EGFP = enhanced GFP; M1 = M1 (full length) isoform of AQP4; M23 = M23 isoform of AQP4; n.d. = no data; n.a. = not applicable. \*Including OSMS. \*\* Wingerchuk 2006 (158): "A diagnosis of NMO or MS based on the final clinical diagnosis rendered by the study neurologist based on his or her integration of all available clinical, imaging, and laboratory data and the period of follow-up after disease onset." Remarks: Ketelslegers 2011 (78), positive patients in the MS group: "Both patients presented with bilateral ON and symptoms related to the spinal cord and cerebral MRI showed lesions typical of MS. During follow-up these patients developed a recurrent disease that is more suspected of an NMOSD.". Ketelslegers 2011 (78), other HRS: includes 23 patients with ON+NETM (4 x pos) and 17 with either isolated LETM or isolated ON (numbers not given separately; all NMO-IgG/AQP4-Ab-negative). Paul 2007 (123), seropositive MS samples: Patients had clinical syndromes related to spinal cord lesions but did not meet Wingerchuk's 1999 criteria for NMO. Kim 2012 (82): M1 was used in parallel, but "positivity rate (...) did not differ significantly". Hayakawa 2008 (32), seropositive MS samples: Patients had "some of the clinical and laboratory features of NMO". Lennon 2005 (90): The authors reported on the first ICC for the detection of AQP4-Ab. However, the assay was not intended for routine testing but to demonstrate that NMO-IgG targets AQP4. Therefore, only three NMO-IgG-positive samples from patients with NMO and three NMO-IgG-negative samples from control patients were tested. Apiwattanakul 2012 (4): Patients with other HRS had LETM + ON + brain lesion meeting Barkhof criteria. Kalluri 2010 (72), second cohort: Samples from 64 OND controls were used to generate the cut-off and were therefore negative *per definitionem*; accordingly, these samples were not taken into account in the table. McKeon 2009 (110): Two seropositive patients in the OND group had intractable vomiting and hiccups, symptoms typically found in NMO-IgG/AQP4-Ab positive NMO; results may thus be truly positive; two additional seropositive OND patients had myelopathy of unknown cause and paraesthesia. Lennon 2004 (91), other HRS: LETM and delayed visual evoked potentials. Lennon 2004 (91): The two NMO-IgG positive patients with MS had "optico-spinal symptoms". McKeon 2009 (110), ON group: For the sake of inter-study consistency – most studies did not distinguish monophasic and relapsing ON – the 40 patients with ON were moved from the OND to the ON group in this table. Nakashima 2006 (116), 'false-positive' patients: One patient developed severe myelitis and optic neuritis, but the brain MRI showed extensive brain lesions; the other patient had two episodes of LETM and two succeeding episodes of cerebellar ataxia and hemiparesis due to the brain lesions; her brain MRI was normal until her third exacerbation. Kim 2012 (83) and Isobe 2012 (38): Transverse myelitis group not included since data on the proportion of LETM and NETM patients was missing. Isobe 2012 (38): The MS group comprised patients with LETM, a HRS, and patients who met NMO criteria; this group was therefore excluded from the analysis. Yoshimura 2013 (160), NMOSD group: Exact clinical data were missing; therefore this study was excluded from the analysis (however, 12/39 [30%] patients were positive, in line with the mean frequency of NMO-IgG/AQP4-Ab [27.6%] of all other studies). Wingerchuk 2006 (158), MS group: See online supplement to reference (158). Petzold 2010 (124): All MS patients had a history of ON. Rostasy 2012 (132), number of LETM and ON patients and AQP4 isoform: Personal communication. Bizzoco 2009 (10), MS group: Included 51 with "probable MS". Bizzoco 2009 (10), other HRS: Optic neuritis and non-extensive transverse myelitis. Bizzoco 2009 (10): The NMO-IgG-positive "MS" patient had a recurrent brainstem syndrome. Lennon 2004 (91), Asian patients: The six positive "[OS]MS" patients were retrospectively found to meet NMO criteria. Jarius 2007 (46) and Jarius 2010 (59): The IHC-positive patient with MS had no features suggestive of NMO. Kim 2013 (81): The four patients with 'other HRS' had myelitis with brain lesions typical of NMO. Waters 2012 (152): The OND group included one patient with LETM; for the sake of inter-study consistency, this sample was included in the LETM group for analysis. Waters 2012 (152), AQP4 isoform CBA Oxford: Personal communication. Matsushita 2009 (107), IHC-F (not CBA): The MS group included patients with OSMS; however, the number of OSMS patients among the seropositives was not specified. Marignier 2008 (102): MS group included nine patients with "probable MS". Hayakawa 2008 (32), IHC and ELISA: The seropositive patients with diagnoses other than NMO had "some of the clinical and laboratory features of NMO". Kang 2012 (75): The two OND patients had "autoimmune neurological disorders"; one of them was positive. Takahashi 2007 (142), IHC (not CBA): The two patients with "other HRS" had NETM and brain lesions typical of NMO. Kalluri (72), first and second cohort (FACS): "Similar results" were obtained with the LN18 cell line transfected with the M23 variant of AQP4. Takahashi 2007 (142), other HRS: Included ON, LETM, and cases of ON and/or NETM plus brain lesions compatible with NMO according to Pittock et al. (127-128) Banwell 2008 (6): Patients with other HRS had LETM + ADEM. Takahashi 2007 (142): IHC-F results not considered, since only CBA-positive samples (i.e. highly selected samples) were tested. Nakashima 2006 (116): All OSMS patients met the 2006 NMO criteria. Matsuoka 2007 (106): Patients with 'other' HRS had LETM and brain lesions. Matsuoka 2007 (106), OSMS: Thirty-one of the OSMS patients had LETM. Matsuoka 2007 (106), CBA: Twenty-six additional OND patients had parasitic, atopic or HTLV-associated myelitis (all AQP4-Ab-negative); however, these patients were not stratified according to lesion length by the authors and are therefore not considered here. Kim 2012 (82), ELISA: The 'other HRS' group comprises patients with recurrent LETM and patients with recurrent ON (proportions not specified). Tanaka 2007 (144): Twenty of 26 OSMS patients had LETM+ON; all NMO-IgG/AQP4-Ab-positive OSMS patients had LETM+ON.
